# Supplementary material for: Precise design and preparation of two 3D organic–inorganic perovskite ferroelectrics (1,5-diazabicyclo[3.2.2]nonane)RbX3 (X = Br, I)
Source: Royal Society of Chemistry journal article supplement (doi:10.1039/d2cc02673b), 2022-01-01
Supplement: d2cc02673b1.pdf [file d2cc02673b1.pdf]

## ESI

Precise design and preparation of two 3D organic–inorganic perovskite ferroelectrics  
(1,5-diazabicyclo[3.2.2]nonane)RbX<sub>3</sub> (X = Br, I)

Keke Han, Mengxia Zhang, Zhenhong Wei\*, Xing Ye, Wenjun Rao, Haina Zhang,  
Hu Cai\*

School of Chemistry and Chemical Engineering, Nanchang University, Nanchang  
City 330031, People's Republic of China

### Experimental section

1,5-Diazabicyclo[3.2.2]nonane was prepared according to the reported literature with little modification (ESI). Other reagents and solvents were purchased from the reagent company and used as received. FT–IR spectra were recorded using KBr pellets in the range of 4000–400 cm<sup>-1</sup> on an ALPHA spectrometer. PXRD analyses were performed using a D8 ADVANCE diffractometer (Cu K $\alpha$  graphite,  $\lambda$  = 1.5406 Å) operating at 40 kV/15 mA with a K $\beta$  foil filter. DSC measurement was carried out on NETZSCH DSC 214 Polyma at a heating/cooling rate of 10 K·min<sup>-1</sup>. Temperature-dependent dielectric constant measurements of powder samples were performed on a TH2828 analyzer in the frequency range of 0.5 kHz to 1 MHz. The Variable-temperature X-ray single-crystal diffraction data were collected on a Rigaku Saturn 924 diffractometer. The structures were solved by direct methods and refined using the SHELXLTL software package.

## Synthesis of 1,5-diazabicyclo[3.2.2]nonane

### (1) 1-(2-Hydroxyethyl)-homopiperazine

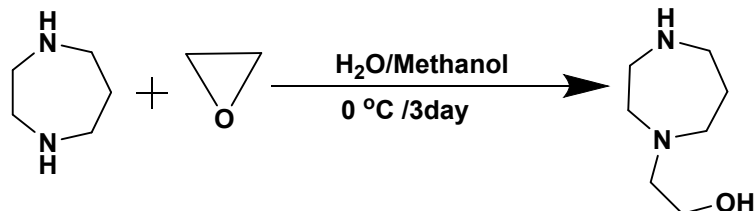

A solution of homopiperazine (60 g, 0.60 mol) in 500 mL deionized water / methanol (1 : 1) was cooled to 0 °C. After 30 mL of ethylene oxide (26.6 g, 0.60 mol) was added, the reaction bottle was immediately sealed tightly, stored at 0 °C for 12 hours. The reaction was continued to stir at room temperature for 3 days, and the solvent was removed by rotary evaporation. Then the light yellow transparent oily product (2-hydroxyethyl) homopiperazine was obtained by vacuum distillation. Yield: 38.0 g, 44.0%. <sup>1</sup>H NMR (400 MHz, CDCl<sub>3</sub>) δ 3.49 (t, *J* = 5.5 Hz, 2H), 2.92–2.74 (m, 4H), 2.70–2.57 (m, 6H), 1.78–1.61 (m, 2H). <sup>13</sup>C NMR (101 MHz, CDCl<sub>3</sub>) δ 59.30 (s), 58.60 (s), 58.13 (s), 54.36 (s), 49.01 (s), 47.44 (s), 30.52 (s).

### (2) 1-(2-Bromoethyl)-homopiperazine dihydrobromide

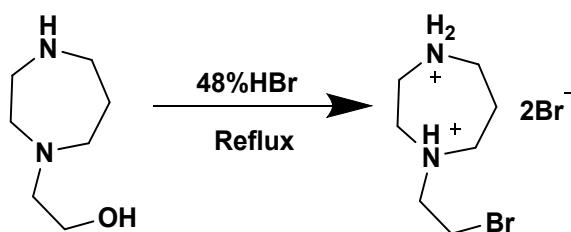

To a solution of 500 mL of 48% hydrobromic acid, 1-(2-hydroxyethyl) homopiperazine (38 g, 0.26 mol), was added. The mixture was refluxed overnight for 12 h, and then the excess acid solution was removed by rotary evaporation. The

product was a dark red viscous oily liquid, which was then triturated with acetone for 6 h to give 1-(2-bromoethyl)-homopiperazine dihydrobromide as a white solid. Yield: 89.1 g, 91.5%.  $^1\text{H}$  NMR (400 MHz,  $\text{D}_2\text{O}$ )  $\delta$  4.07–3.81 (m, 8H), 3.76 (s, 2H), 3.63–3.51 (m, 2H), 2.50–2.36 (m, 2H).  $^{13}\text{C}$  NMR (101 MHz,  $\text{D}_2\text{O}$ )  $\delta$  57.86 (s), 54.14 (s), 50.30 (s), 45.13 (s), 40.92 (s), 24.01 (s), 20.68 (s).

### (3) 1,5-Diazabicyclo[3.2.2]nonane

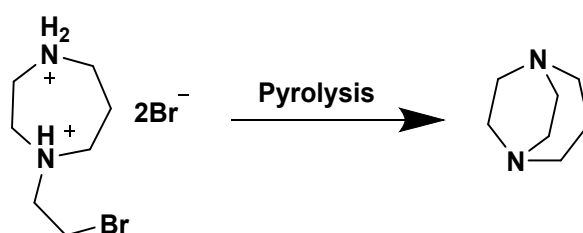

Pyrolysis of 1-(2-bromoethyl)-homopiperazine dihydrobromide (40 g, 0.11 mol) at 235-245 °C with mechanical stirring, after 90 min the melt became very hard and sticking to the side to keep the flask from stirring was effective, and the pyrolysis process continued for 3.5 hours as hydrogen bromide was still released. After the reaction was completed, the crude mixture was dissolved in a concentrated KOH aqueous solution for alkalization. After reaction for 3 h, the mixture was extracted with toluene, dried with anhydrous sodium carbonate, and then rotary evaporated to remove the solvent toluene to obtain a pale yellow needle-like solid product 1,5-diazabicyclo[3.2.2]nonane. Yield: 5.4931 g, 40.2%.  $^1\text{H}$  NMR (400 MHz,  $\text{D}_2\text{O}$ )  $\delta$  3.01–2.93 (m, 4H), 2.92–2.82 (m, 4H), 2.80–2.70 (m, 4H), 1.89–1.81 (m, 2H).  $^{13}\text{C}$  NMR (101 MHz,  $\text{D}_2\text{O}$ )  $\delta$  55.07 (s), 46.06 (s), 25.54 (s).

**Synthesis of [3.2.2-dabcn]RbBr<sub>3</sub> (1):** To a HBr aqueous solution, 3.2.2-dabcn (0.38 g, 3 mmol) and RbBr (0.50 g, 3mmol) were added, and the mixture was stirred at 70

°C for one hour. Evaporation of the aqueous solution under the heating gave block white crystals **1**. Yield: 1.12 g, 82% (based on RbBr). Anal. Calcd for  $C_7H_{16}N_2RbBr_3$ : C 18.54, H 3.56, N 6.18%. Found: C 18.27, H 3.44, N 6.37%. IR (KBr disc,  $cm^{-1}$ ): 3457(w), 2902(vs), 2796(vs), 1723(m), 1413(s), 1050(s), 983(m), 815(m), 735(m).

**Synthesis of [3.2.2-dabcn]RbI<sub>3</sub> (2):** According to the similar procedures to synthesize compound **1**, led to the formation of compound **2** as block crystals. Yield: 1.52 g, 85% (based on RbI). Anal. Calcd for  $C_7H_{16}N_2RbI_3$ : C 14.14, H 2.71, N 4.71%. Found: C 14.54, H 2.39, N 4.61%. IR (KBr disc,  $cm^{-1}$ ): 3436(w), 2912(vs), 2798(vs), 2596(vs), 1059(s), 988(m), 839(m), 750(m).

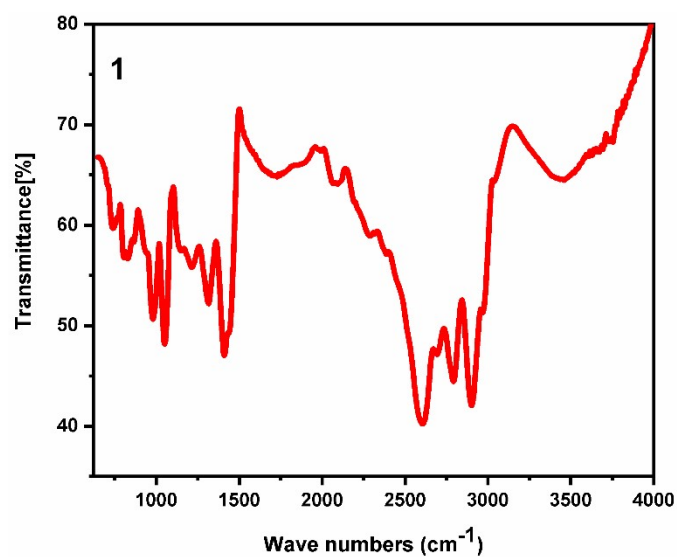

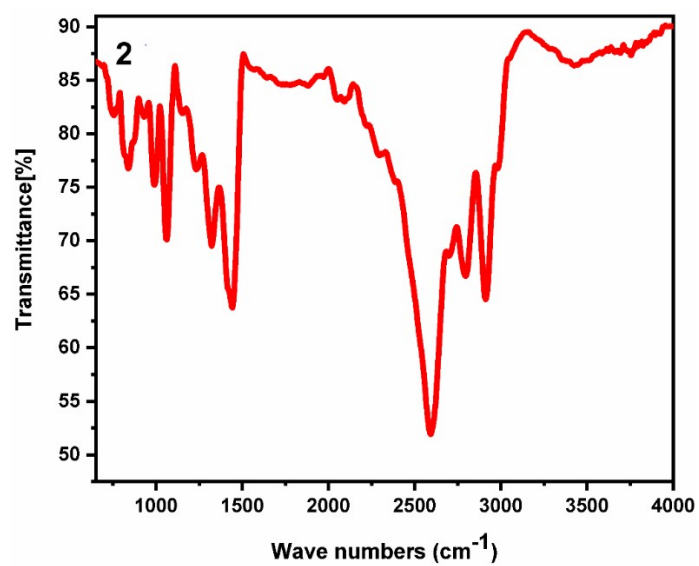

Figure S1. IR spectra of 1 and 2.

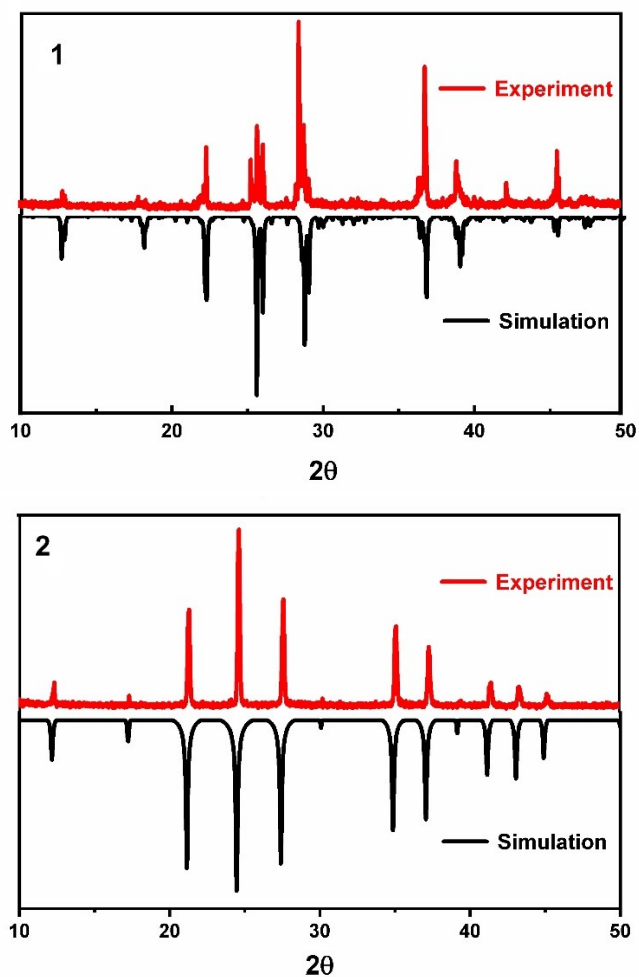

Figure S2. The powder X-ray diffraction patterns of compounds 1 and 2 with the simulated one in black and the experimental one in red.

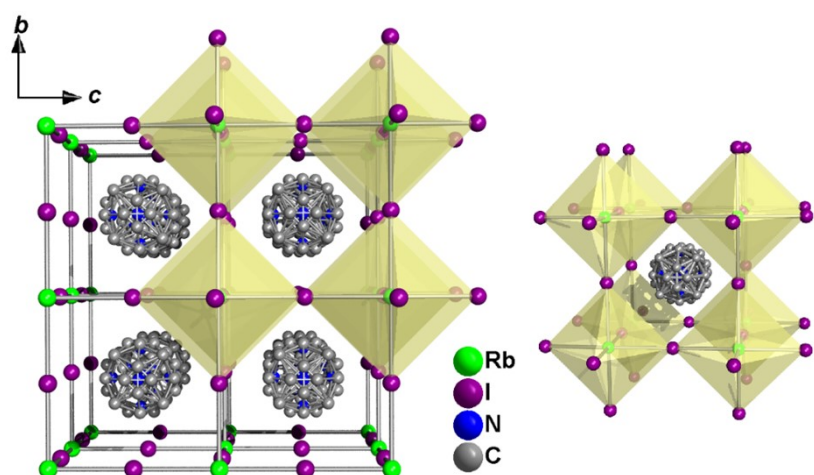

**Figure S3.** Crystal structures of [3.2.2-dabcn]RbI<sub>3</sub> (2) at 298 K.

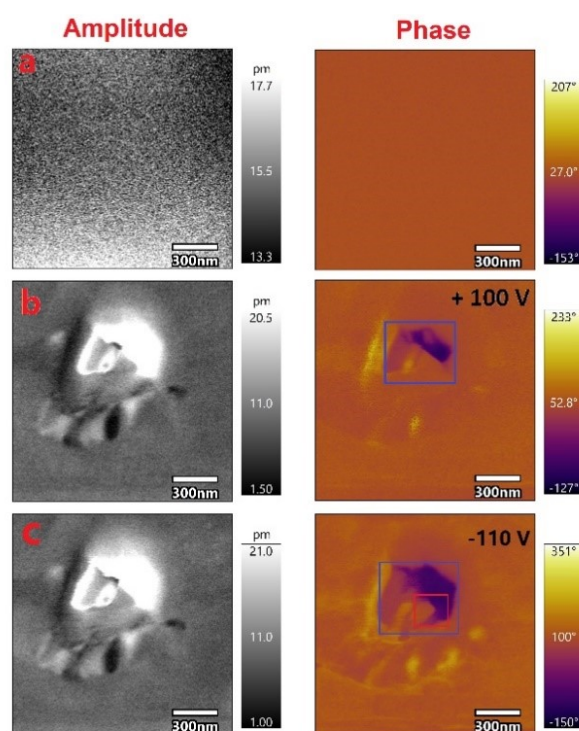

**Figure S4.** Domain manipulation. VPFM amplitude image (left), and VPFM phase image (right). (a) Images for the initial state of the as-grown crystallite. (b) Images for the state after the first switching operation in the region of the blue rectangle, produced by scanning with the tip bias of 100 V. (c) Images for the state after the succeeding back-switching operation in the region of the smaller red rectangle, produced by scanning with the tip bias of  $-110$  V.

**Table S1.** Crystal data and structure refinement for compound **1** at LTP and HTP.

| Compound                                | LTP (281 K)                                                      | HTP (358 K)                                                      |
|-----------------------------------------|------------------------------------------------------------------|------------------------------------------------------------------|
| CCDC numbers                            | 2171392                                                          | 2171586                                                          |
| Formula                                 | C <sub>7</sub> H <sub>16</sub> N <sub>2</sub> Br <sub>3</sub> Rb | C <sub>7</sub> H <sub>16</sub> N <sub>2</sub> Br <sub>3</sub> Rb |
| Formula Mass                            | 453.39                                                           | 453.39                                                           |
| Crystal system                          | Orthorhombic                                                     | Cubic                                                            |
| Space group                             | <i>Pmn</i> 2 <sub>1</sub>                                        | <i>Pm</i> <sup>3</sup> <i>m</i>                                  |
| <i>a</i> (Å)                            | 48.9591(6)                                                       | 6.94400(10)                                                      |
| <i>b</i> (Å)                            | 6.84360(10)                                                      | 6.94400(10)                                                      |
| <i>c</i> (Å)                            | 9.86670(10)                                                      | 6.94400(10)                                                      |
| $\alpha$ (°)                            | 90                                                               | 90                                                               |
| $\beta$ (°)                             | 90                                                               | 90                                                               |
| $\gamma$ (°)                            | 90                                                               | 90                                                               |
| <i>V</i> (Å) <sup>3</sup>               | 3305.90(7)                                                       | 334.834(8)                                                       |
| <i>Z</i>                                | 2                                                                | 1                                                                |
| D <sub>calc</sub> (g·cm <sup>-3</sup> ) | 2.277                                                            | 2.325                                                            |
| <i>F</i> (000)                          | 2140.0                                                           | 213.8                                                            |
| $\theta_{\max}$                         | 76.63                                                            | 72.74                                                            |
| $\mu$ (Mo Ka,mm <sup>-1</sup> )         | 15.483                                                           | 15.294                                                           |
| Total no. of reflns.                    | 12219                                                            | 360                                                              |
| No. of unique reflns.                   | 7057 [ <i>R</i> ( <sub>int</sub> ) = 0.0813]                     | 95 [ <i>R</i> ( <sub>int</sub> ) = 0.0587]                       |
| No. of variables                        | 299                                                              | 17                                                               |

|                                      |                |                |
|--------------------------------------|----------------|----------------|
| $R_1, wR_2$ (obsd data)              | 0.0611, 0.1595 | 0.0446, 0.1365 |
| $R_1, wR_2$ (all data)               | 0.0628, 0.1617 | 0.0477, 0.1422 |
| GOF, S                               | 1.019          | 1.179          |
| Max./min. peak (e. Å <sup>-3</sup> ) | 1.44, -1.44    | 0.91, -0.56    |
| Flack parameter                      | 0.08(6)        | /              |

**Table S2.** Hydrogen bond lengths [Å] and bond angles [°] of compound **1**

| D-H...A                  | D-H [Å] | H...A[Å] | D...A[Å] | D-H...A[°] |
|--------------------------|---------|----------|----------|------------|
| N1-H1...Br8 <sup>3</sup> | 0.98    | 2.39     | 3.237    | 143.87     |
| N2-H2...Br3 <sup>1</sup> | 0.98    | 2.27     | 3.214    | 162.09     |
| N3-H3...Br4 <sup>3</sup> | 0.98    | 2.29     | 3.254    | 167.13     |
| N4-H4...Br2 <sup>2</sup> | 0.98    | 2.33     | 3.254    | 157.51     |
| N5-H5...Br5              | 0.98    | 2.29     | 2.236    | 161.90     |

<sup>1</sup>  $x, -1 + y, z$ ; <sup>2</sup>  $x, 1 + y, z$ ; <sup>3</sup>  $x, y, -1 + z$ .

**Table S3.** The bond length [Å] and bond angle [°] of compound **1** at 281 K

| label                | Lengths [Å] | label                                  | Angles [°] |
|----------------------|-------------|----------------------------------------|------------|
| Rb1–Br1              | 3.4134(13)  | Br1–Rb1–Br1 <sup>1</sup>               | 169.97(7)  |
| Rb1–Br1 <sup>1</sup> | 3.4565(13)  | Br1–Rb1–Br2 <sup>2</sup>               | 99.02(4)   |
| Rb1–Br2              | 3.496(2)    | Br1 <sup>1</sup> –Rb1–Br2 <sup>2</sup> | 86.24(4)   |
| Rb1–Br2 <sup>2</sup> | 3.490(2)    | Br1 <sup>1</sup> –Rb1–Br2              | 91.64(4)   |
| Rb1–Br3              | 3.4934(19)  | Br1–Rb1–Br2                            | 79.76(4)   |



| label                | Lengths [Å] | label                                  | Angles [°] |
|----------------------|-------------|----------------------------------------|------------|
| Rb1–Br4              | 3.617(2)    | Br1–Rb1–Br3                            | 94.06(4)   |
| Rb2–Br3 <sup>3</sup> | 3.4917(19)  | Br1 <sup>1</sup> –Rb1–Br3              | 80.74(4)   |
| Rb2–Br4              | 3.540(2)    | Br1–Rb1–Br4                            | 91.53(4)   |
| Rb2–Br5              | 3.4214(14)  | Br1 <sup>1</sup> –Rb1–Br4              | 97.56(4)   |
| Rb2–Br5 <sup>1</sup> | 3.4881(14)  | Br2 <sup>2</sup> –Rb1–Br2              | 91.28(3)   |
| Rb2–Br6              | 3.432(2)    | Br2 <sup>2</sup> –Rb1–Br3              | 166.91(4)  |
| Rb2–Br8 <sup>4</sup> | 3.522(2)    | Br2–Rb1–Br4                            | 169.30(4)  |
| Rb3–Br6 <sup>5</sup> | 3.470(2)    | Br2 <sup>2</sup> –Rb1–Br4              | 83.92(5)   |
| Rb3–Br6              | 3.470(2)    | Br3–Rb1–Br2                            | 90.42(5)   |
| Rb3–Br7              | 3.502(2)    | Br3–Rb1–Br4                            | 96.43(4)   |
| Rb3–Br7 <sup>6</sup> | 3.454(2)    | Br3 <sup>3</sup> –Rb2–Br4              | 83.33(4)   |
| Rb3–Br8              | 3.5377(18)  | Br3 <sup>3</sup> –Rb2–Br8 <sup>4</sup> | 167.16(5)  |
| Rb3–Br8 <sup>5</sup> | 3.5377(18)  | Br5 <sup>1</sup> –Rb2–Br3 <sup>3</sup> | 83.12(4)   |
|                      |             | Br5–Rb2–Br3 <sup>3</sup>               | 94.77(4)   |
|                      |             | Br5–Rb2–Br4                            | 93.82(4)   |
|                      |             | Br5 <sup>1</sup> –Rb2–Br4              | 101.48(4)  |
|                      |             | Br5–Rb2–Br5 <sup>1</sup>               | 164.17(7)  |
|                      |             | Br5–Rb2–Br6                            | 79.94(4)   |
|                      |             | Br5 <sup>1</sup> –Rb2–Br8 <sup>4</sup> | 91.08(4)   |
|                      |             | Br5–Rb2–Br8 <sup>4</sup>               | 93.87(4)   |
|                      |             | Br6–Rb2–Br3 <sup>3</sup>               | 90.96(5)   |

| label | Lengths [Å] | label                                  | Angles [°] |
|-------|-------------|----------------------------------------|------------|
|       |             | Br6–Rb2–Br4                            | 171.20(5)  |
|       |             | Br6–Rb2–Br5 <sup>1</sup>               | 84.40(4)   |
|       |             | Br6–Rb2–Br8 <sup>4</sup>               | 99.90(5)   |
|       |             | Br8 <sup>4</sup> –Rb2–Br4              | 86.63(5)   |
|       |             | Br6 <sup>5</sup> –Rb3–Br6              | 84.14(7)   |
|       |             | Br6 <sup>5</sup> –Rb3–Br7              | 101.64(5)  |
|       |             | Br6–Rb3–Br7                            | 101.64(5)  |
|       |             | Br6 <sup>5</sup> –Rb3–Br8 <sup>5</sup> | 82.52(4)   |
|       |             | Br6–Rb3–Br8                            | 82.52(4)   |
|       |             | Br6–Rb3–Br8 <sup>5</sup>               | 166.16(6)  |
|       |             | Br6 <sup>5</sup> –Rb3–Br8              | 166.16(6)  |
|       |             | Br7 <sup>6</sup> –Rb3–Br6              | 93.64(5)   |
|       |             | Br7 <sup>6</sup> –Rb3–Br6 <sup>5</sup> | 93.64(5)   |
|       |             | Br7 <sup>6</sup> –Rb3–Br7              | 159.32(11) |
|       |             | Br7 <sup>6</sup> –Rb3–Br8 <sup>5</sup> | 83.57(5)   |
|       |             | Br7–Rb3–Br8 <sup>5</sup>               | 84.69(4)   |
|       |             | Br7 <sup>6</sup> –Rb3–Br8              | 83.57(5)   |
|       |             | Br7–Rb3–Br8                            | 84.69(4)   |
|       |             | Br8 <sub>5</sub> –Rb3–Br8              | 110.52(8)  |
|       |             | Rb1–Br1–Rb1 <sub>6</sub>               | 169.96(7)  |
|       |             | Rb1 <sup>7</sup> –Br2–Rb1              | 166.61(4)  |

| label | Lengths [Å] | label                     | Angles [°] |
|-------|-------------|---------------------------|------------|
|       |             | Rb2 <sup>4</sup> –Br3–Rb1 | 166.83(4)  |
|       |             | Rb2–Br4–Rb1               | 161.49(6)  |
|       |             | Rb2–Br5–Rb2 <sup>6</sup>  | 164.17(7)  |
|       |             | Rb2–Br6–Rb3               | 172.14(5)  |
|       |             | Rb3 <sup>1</sup> –Br7–Rb3 | 159.32(11) |
|       |             | Rb2 <sup>3</sup> –Br8–Rb3 | 157.88(6)  |

<sup>1</sup>+ x, 1 + y, + z; <sup>2</sup>1/2 - x, - y, 1/2 + z; <sup>3</sup>+ x, + y, 1 + z; <sup>4</sup>+ x, + y, -1 + z; <sup>5</sup>- x, + y, + z; <sup>6</sup>+ x, -1 + y, + z; <sup>7</sup>1/2 - x, - y, -1/2 + z.

**Table S4.** The bond length [Å] and bond angle [°] of compound **1** at 358 K

| label                 | Lengths [Å] | label                                  | Angles [°] |
|-----------------------|-------------|----------------------------------------|------------|
| Rb1–Br1 <sup>1</sup>  | 3.47200(5)  | Br1 <sup>1</sup> –Rb1–Br1              | 90         |
| Rb1–Br1 <sup>2</sup>  | 3.47200(5)  | Br1 <sup>2</sup> –Rb1–Br1 <sup>3</sup> | 90         |
| Rb1–Br1               | 3.47200(5)  | Br1 <sup>2</sup> –Rb1–Br1 <sup>4</sup> | 90         |
| Rb1–Br1 <sup>3</sup>  | 3.47200(5)  | Br1 <sup>5</sup> –Rb1–Br1 <sup>3</sup> | 90         |
| Rb1–Br1 <sup>4</sup>  | 3.47200(5)  | Br1–Rb1–Br1 <sup>4</sup>               | 90         |
| Rb1–Br1 <sup>5</sup>  | 3.47200(5)  | Br1 <sup>5</sup> –Rb1–Br1 <sup>4</sup> | 90         |
| Rb1–Br1A <sup>6</sup> | 3.4986(9)   | Br1 <sup>1</sup> –Rb1–Br1 <sup>2</sup> | 90         |
| Rb1–Br1A <sup>7</sup> | 3.4986(9)   | Br1 <sup>1</sup> –Rb1–Br1 <sup>5</sup> | 180        |
| Rb1–Br1A <sup>8</sup> | 3.4986(9)   | Br1–Rb1–Br1 <sup>2</sup>               | 180        |
| Rb1–Br1A <sup>9</sup> | 3.4986(9)   | Br1 <sup>1</sup> –Rb1–Br1 <sup>4</sup> | 90         |
| Rb1–Br1A <sup>4</sup> | 3.4986(9)   | Br1 <sup>5</sup> –Rb1–Br1 <sup>2</sup> | 90         |

| label                   | Lengths [Å] | label                                    | Angles [°] |
|-------------------------|-------------|------------------------------------------|------------|
| Rb1–Br1A <sup>10</sup>  | 3.4986(9)   | Br1–Rb1–Br1 <sup>5</sup>                 | 90         |
| Br1A–Br1A <sup>10</sup> | 0.609(11)   | Br1 <sup>1</sup> –Rb1–Br1 <sup>3</sup>   | 90         |
| Br1A–Br1A <sup>11</sup> | 0.609(11)   | Br1–Rb1–Br1 <sup>3</sup>                 | 90         |
| Br1A–Br1A <sup>8</sup>  | 0.862(15)   | Br1 <sup>3</sup> –Rb1–Br1 <sup>4</sup>   | 180        |
|                         |             | Br1 <sup>3</sup> –Rb1–Br1A <sup>2</sup>  | 90         |
|                         |             | Br1 <sup>5</sup> –Rb1–Br1A <sup>6</sup>  | 90         |
|                         |             | Br1–Rb1–Br1A <sup>2</sup>                | 172.92(12) |
|                         |             | Br1 <sup>1</sup> –Rb1–Br1A <sup>7</sup>  | 97.08(12)  |
|                         |             | Br1 <sup>4</sup> –Rb1–Br1A <sup>6</sup>  | 97.08(12)  |
|                         |             | Br1 <sup>5</sup> –Rb1–Br1A <sup>7</sup>  | 82.92(12)  |
|                         |             | Br1 <sup>1</sup> –Rb1–Br1A <sup>8</sup>  | 82.92(12)  |
|                         |             | Br1 <sup>3</sup> –Rb1–Br1A <sup>7</sup>  | 90         |
|                         |             | Br1 <sup>2</sup> –Rb1–Br1A <sup>6</sup>  | 172.92(12) |
|                         |             | Br1 <sup>1</sup> –Rb1–Br1A <sup>9</sup>  | 97.08(12)  |
|                         |             | Br1–Rb1–Br1A <sup>9</sup>                | 90         |
|                         |             | Br1 <sup>5</sup> –Rb1–Br1A <sup>9</sup>  | 82.92(12)  |
|                         |             | Br1 <sup>2</sup> –Rb1–Br1A <sup>9</sup>  | 90         |
|                         |             | Br1 <sup>4</sup> –Rb1–Br1A <sup>9</sup>  | 172.92(12) |
|                         |             | Br1–Rb1–Br1A <sup>6</sup>                | 7.08(12)   |
|                         |             | Br1 <sup>1</sup> –Rb1–Br1A <sup>10</sup> | 90         |
|                         |             | Br1 <sup>2</sup> –Rb1–Br1A <sup>2</sup>  | 7.08(12)   |

| label | Lengths [Å] | label                                    | Angles [°] |
|-------|-------------|------------------------------------------|------------|
|       |             | Br1–Rb1–Br1A <sup>10</sup>               | 172.92(12) |
|       |             | Br1 <sup>5</sup> –Rb1–Br1A <sup>8</sup>  | 97.08(12)  |
|       |             | Br1 <sup>5</sup> –Rb1–Br1A <sup>10</sup> | 90         |
|       |             | Br1 <sup>1</sup> –Rb1–Br1A <sup>2</sup>  | 82.92(12)  |
|       |             | Br1 <sup>2</sup> –Rb1–Br1A <sup>10</sup> | 7.08(12)   |
|       |             | Br1 <sup>4</sup> –Rb1–Br1A <sup>2</sup>  | 90         |
|       |             | Br1 <sup>3</sup> –Rb1–Br1A <sup>10</sup> | 97.08(12)  |
|       |             | Br1 <sup>3</sup> –Rb1–Br1A <sup>6</sup>  | 82.92(12)  |
|       |             | Br1 <sup>4</sup> –Rb1–Br1A <sup>10</sup> | 82.92(12)  |
|       |             | Br1–Rb1–Br1A <sup>7</sup>                | 7.08(12)   |
|       |             | Br1–Rb1–Br1A <sup>8</sup>                | 90         |
|       |             | Br1 <sup>5</sup> –Rb1–Br1A <sup>2</sup>  | 97.08(12)  |
|       |             | Br1 <sup>2</sup> –Rb1–Br1A <sup>8</sup>  | 90         |
|       |             | Br1 <sup>2</sup> –Rb1–Br1A <sup>7</sup>  | 172.92(12) |
|       |             | Br1 <sup>4</sup> –Rb1–Br1A <sup>8</sup>  | 7.08(12)   |
|       |             | Br1 <sup>3</sup> –Rb1–Br1A <sup>8</sup>  | 172.92(12) |
|       |             | Br1 <sup>3</sup> –Rb1–Br1A <sup>9</sup>  | 7.08(12)   |
|       |             | Br1 <sup>4</sup> –Rb1–Br1A <sup>7</sup>  | 90         |
|       |             | Br1 <sup>1</sup> –Rb1–Br1A <sup>6</sup>  | 90         |
|       |             | Br1A <sup>6</sup> –Rb1–Br1A <sup>9</sup> | 82.98(12)  |
|       |             | Br1A <sup>6</sup> –Rb1–Br1A <sup>8</sup> | 97.02(12)  |

| label | Lengths [Å] | label                                     | Angles [°] |
|-------|-------------|-------------------------------------------|------------|
|       |             | Br1A <sup>9</sup> -Rb1-Br1A <sup>8</sup>  | 180.0(2)   |
|       |             | Br1A <sup>10</sup> -Rb1-Br1A <sup>9</sup> | 97.02(12)  |
|       |             | Br1A <sup>7</sup> -Rb1-Br1A <sup>9</sup>  | 89.13(3)   |
|       |             | Br1A <sup>7</sup> -Rb1-Br1A <sup>8</sup>  | 90.87(3)   |
|       |             | Br1A <sup>10</sup> -Rb1-Br1A <sup>8</sup> | 82.98(12)  |
|       |             | Br1A <sup>2</sup> -Rb1-Br1A <sup>9</sup>  | 90.87(3)   |
|       |             | Br1A <sup>2</sup> -Rb1-Br1A <sup>8</sup>  | 89.13(3)   |
|       |             | Rb1 <sup>11</sup> -Br1-Rb1                | 180        |
|       |             | Rb1 <sup>11</sup> -Br1A-Rb1               | 165.8(2)   |
|       |             | Br1A <sup>12</sup> -Br1A-Rb1              | 85.00(9)   |
|       |             | Br1A <sup>6</sup> -Br1A-Rb1               | 85.00(9)   |
|       |             | Br1A <sup>7</sup> -Br1A-Rb1               | 82.92(12)  |

<sup>1</sup>1 + y, + z, + x; <sup>2</sup>2 + x, 1 + y, + z; <sup>3</sup>3 + z, + x, + y; <sup>4</sup>4 + z, + x, 1 + y; <sup>5</sup>5 + y, + z, + x; <sup>6</sup>6 + z, + y, - x;  
<sup>7</sup>7 - x, -1 - y, - z; <sup>8</sup>8 + x, + z, - y; <sup>9</sup>9 - x, - z, + y; <sup>10</sup>10 - z, - y, + x; <sup>11</sup>11 + x, -1 + y, + z; <sup>12</sup>12 - z, -1 - y,  
+ x; <sup>13</sup>13 + x, + y, 1 - z; <sup>14</sup>14 + z, -1 - y, + x; <sup>15</sup>15 + x, - z, - y; <sup>16</sup>16 + x, -1 + z, - y; <sup>17</sup>17 + z, -1 + x, 1 + y;  
<sup>18</sup>18 1 + y, -1 + z, + x; <sup>19</sup>19 + z, - x, - y; <sup>20</sup>20 1 + y, - z, + x; <sup>21</sup>21 1 - z, -1 - y, + x.

**Table S5.** Crystal data and structure refinement for compound **2** at RTP.

| Compound     | RTP (298 K)                                                     |
|--------------|-----------------------------------------------------------------|
| CCDC numbers | 2171585                                                         |
| Formula      | C <sub>7</sub> H <sub>16</sub> N <sub>2</sub> I <sub>3</sub> Rb |
| Formula Mass | 593.76                                                          |

---

|                                         |                       |
|-----------------------------------------|-----------------------|
| Crystal system                          | Cubic                 |
| Space group                             | $Pm\bar{3}m$          |
| $a$ (Å)                                 | 7.4069(6)             |
| $b$ (Å)                                 | 7.4069(6)             |
| $c$ (Å)                                 | 7.4069(6)             |
| $\alpha$ (°)                            | 90                    |
| $\beta$ (°)                             | 90                    |
| $\gamma$ (°)                            | 90                    |
| $V$ (Å) <sup>3</sup>                    | 406.36(6)             |
| $Z$                                     | 1                     |
| $D_{\text{calc}}$ (g·cm <sup>-3</sup> ) | 2.392                 |
| $F(000)$                                | 255.6                 |
| $\theta_{\text{max}}$                   | 27.24                 |
| $\mu$ (Mo Ka,mm <sup>-1</sup> )         | 8.716                 |
| Total no. of reflns.                    | 2445                  |
| No. of unique reflns.                   | 128 [R(int) = 0.0280] |
| No. of variables                        | 16                    |
| $R_1, wR_2$ (obsd data)                 | 0.0378, 0.0849        |
| $R_1, wR_2$ (all data)                  | 0.0430, 0.0868        |
| GOF, S                                  | 1.471                 |
| Max./min. peak (e. Å <sup>-3</sup> )    | 0.38, -0.85           |

---

**Table S6.** The bond length [ $\text{\AA}$ ] and bond angle [ $^\circ$ ] of compound **2** at 298 K

| label               | Lengths [ $\text{\AA}$ ] | label                                | Angles [ $^\circ$ ] |
|---------------------|--------------------------|--------------------------------------|---------------------|
| Rb1–I1 <sup>1</sup> | 3.7034(3)                | I1 <sup>1</sup> –Rb1–I1              | 90                  |
| Rb1–I1 <sup>2</sup> | 3.7035(3)                | I1 <sup>2</sup> –Rb1–I1 <sup>3</sup> | 90                  |
| Rb1–I1 <sup>3</sup> | 3.7034(3)                | I1 <sup>2</sup> –Rb1–I1 <sup>4</sup> | 90                  |
| Rb1–I1              | 3.7034(3)                | I1 <sup>1</sup> –Rb1–I1 <sup>2</sup> | 90                  |
| Rb1–I1 <sup>4</sup> | 3.7034(3)                | I1 <sup>1</sup> –Rb1–I1 <sup>4</sup> | 180                 |
| Rb1–I1 <sup>5</sup> | 3.7034(3)                | I1–Rb1–I1 <sup>2</sup>               | 180                 |
| I1–Rb1 <sup>6</sup> | 3.7034(3)                | I1–Rb1–I1 <sup>3</sup>               | 90                  |
|                     |                          | I1 <sup>1</sup> –Rb1–I1 <sup>5</sup> | 90                  |
|                     |                          | I1 <sup>5</sup> –Rb1–I1 <sup>3</sup> | 180                 |
|                     |                          | I1–Rb1–I1 <sup>5</sup>               | 90                  |
|                     |                          | I1–Rb1–I1 <sup>4</sup>               | 90                  |
|                     |                          | I1 <sup>2</sup> –Rb1–I1 <sup>5</sup> | 90                  |
|                     |                          | I1 <sup>3</sup> –Rb1–I1 <sup>4</sup> | 90                  |
|                     |                          | I1 <sup>1</sup> –Rb1–I1 <sup>3</sup> | 90                  |
|                     |                          | I1 <sup>5</sup> –Rb1–I1 <sup>4</sup> | 90                  |
|                     |                          | Rb1 <sup>6</sup> –I1–Rb1             | 180                 |

<sup>1</sup> + y, 1 + z, + x; <sup>2</sup> + x, + y, 1 + z; <sup>3</sup> 1 + z, + x, + y; <sup>4</sup> + y, + z, + x; <sup>5</sup> + z, + x, + y; <sup>6</sup> + x, + y, -1 + z; <sup>7</sup> + x, + y, - z; <sup>8</sup> - x, + y, - z; <sup>9</sup> - x, + y, + z; <sup>10</sup> + z, + y, - x; <sup>11</sup> - z, + y, - x; <sup>12</sup> - x, + z, + y; <sup>13</sup> - y, + z, - x; <sup>14</sup> + x, + z, - y; <sup>15</sup> + y, + x, + z; <sup>16</sup> - y, - x, + z; <sup>17</sup> - z, + x, + y; <sup>18</sup> - x, - y, + z
